# Supplementary material for: Benefits of brief mindfulness induction on heart rate variability only significant among participants with low executive functioning
Source: Research Square preprint supplement (doi:10.21203/rs.3.rs-6613113/v1), 2025-06-09

Correlations regarding the primary analyses: HRV indices, executive function scores and manipulations checks.


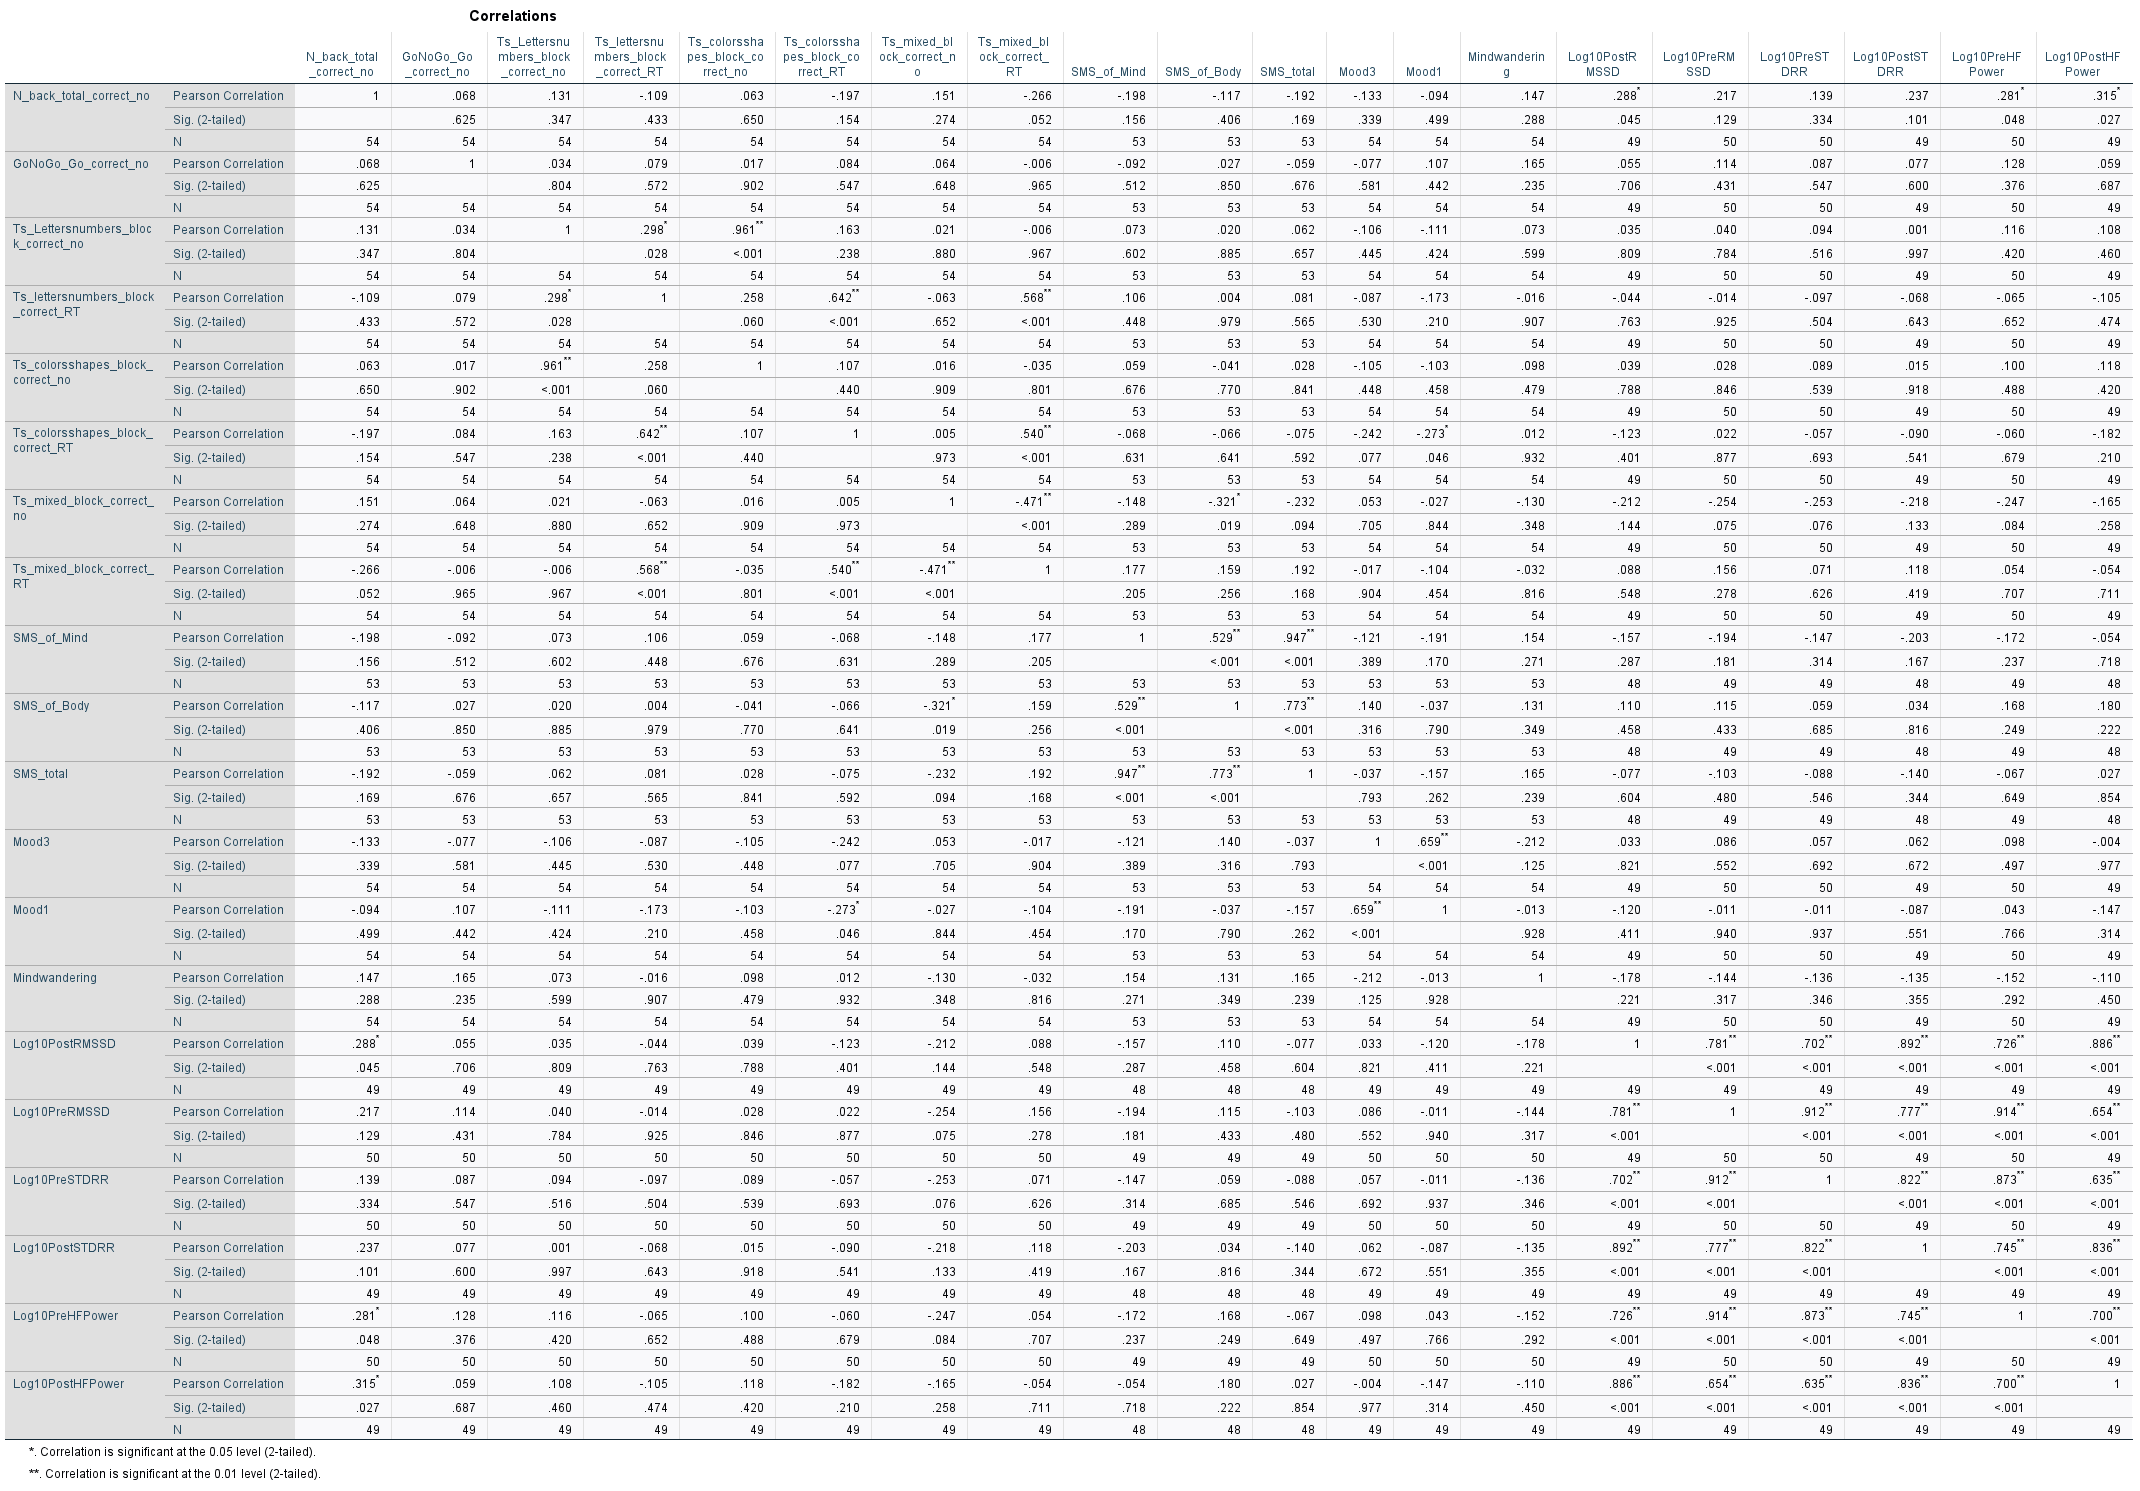


Correlations regarding the secondary analyses: executive function scores, manipulation checks and state scores.


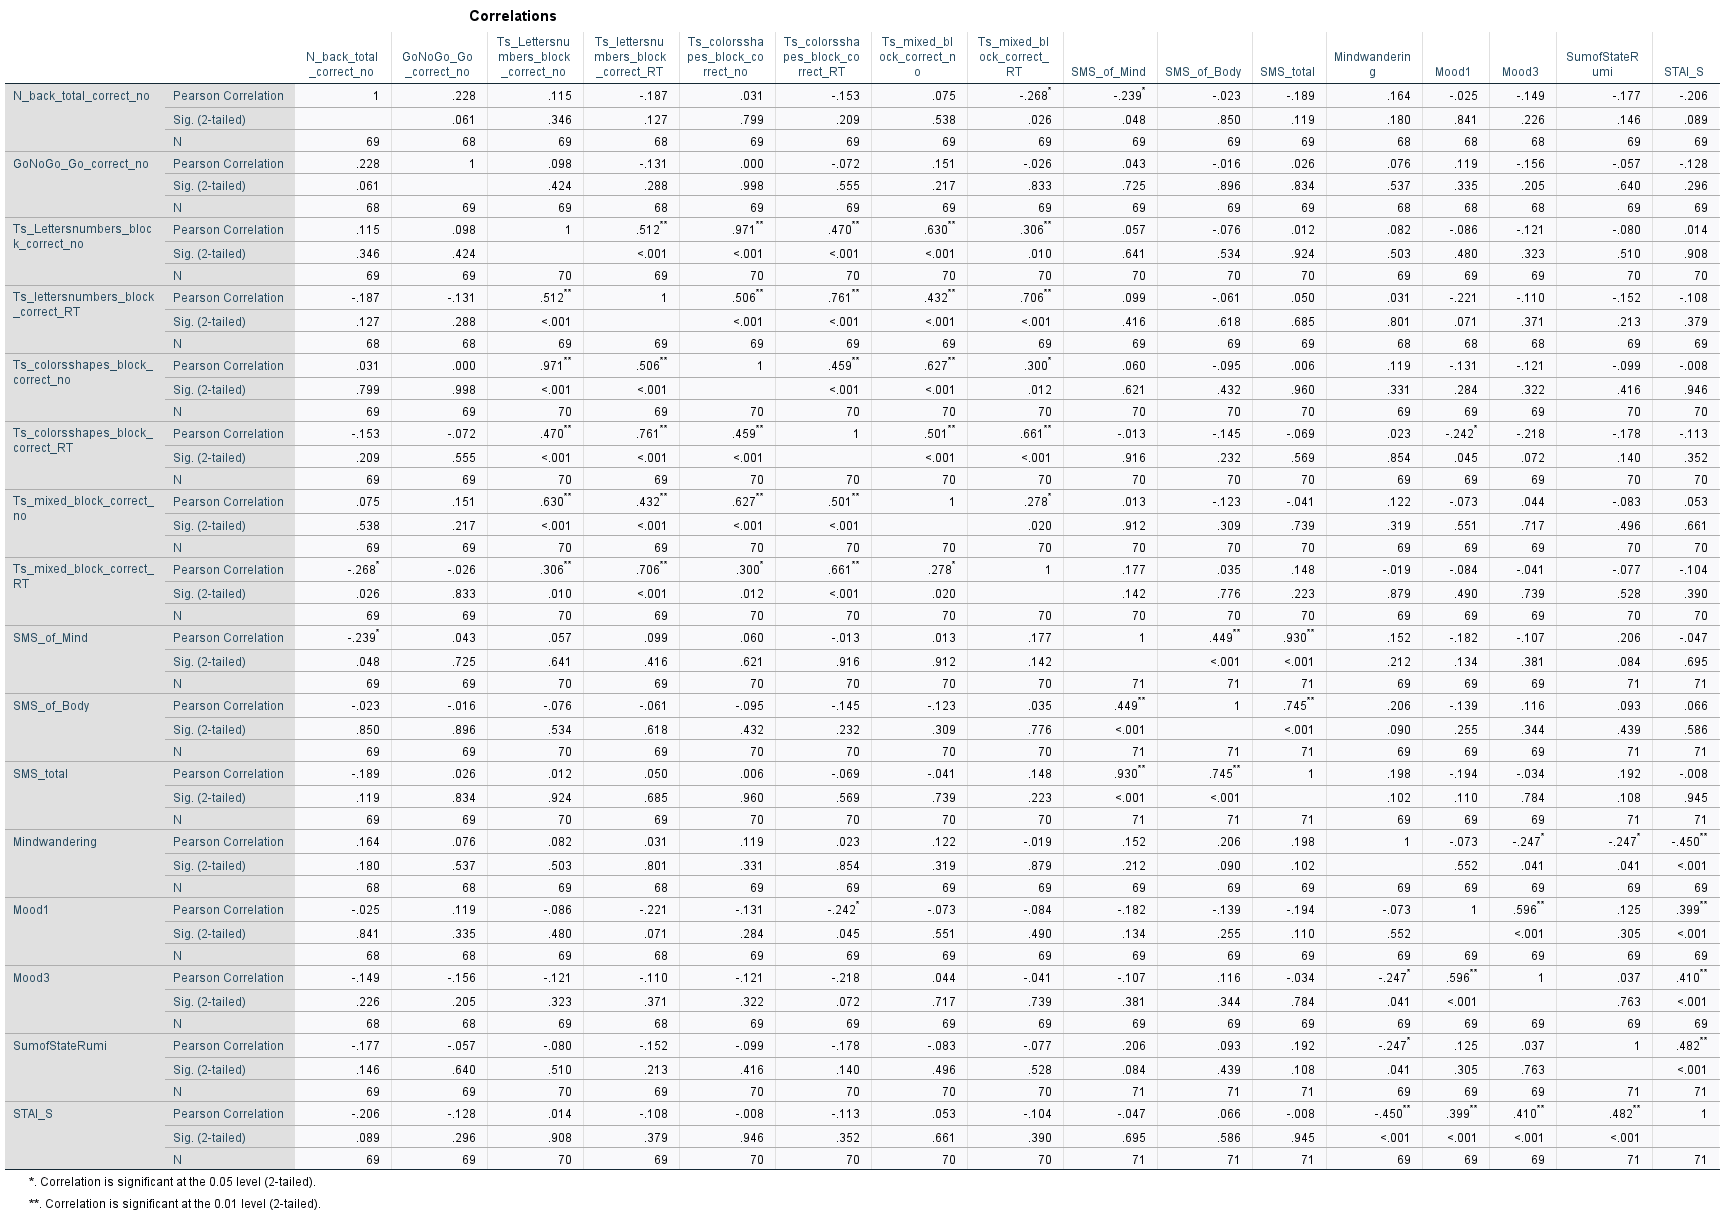

Supplement: Supplementary file 1 [file f89c8c8d2d719579d7fa9d0a.docx]
